# Supplementary material for: A new highly selective “off–on” typical chemosensor of Al3+, 1-((Z)-((E)-(3,5-dichloro-2-hydroxybenzylidene)hydrazono)methyl) naphthalene-2-ol, an experimental and in silico study
Source: Royal Society of Chemistry journal article supplement (doi:10.1039/d1ra08232a), 2022-01-01
Supplement: d1ra08232a1.pdf [file d1ra08232a1.pdf]

## SUPPORTING INFORMATION

### **A New Highly Selective “off-on” Typical Chemosensor of Al<sup>3+</sup>, 1-((Z)-((E)-(3,5-dichloro-2-hydroxybenzylidene)hydrazono)methyl) naphthalene-2-ol, An experimental and In-Silico Study**

Jamaludin Al Anshori,<sup>\*a</sup> Daliah Ismalah,<sup>a</sup> Ajar Faflul Abror,<sup>a</sup> Achmad Zainuddin,<sup>a</sup> Ika Wiani H.,<sup>a</sup> Muhammad Yusuf,<sup>a</sup> Rani Maharani,<sup>a</sup> Ace T. Hidayat<sup>a</sup>

Department of Chemistry, Faculty of Mathematics and Natural Sciences  
Universitas Padjadjaran,  
Bandung-Sumedang km.21, Jatinangor Sumedang, 45363, Indonesia  
<sup>\*</sup>Email: jamaludin.al.anshori@unpad.ac.id

#### LIST OF CONTENTS

|                                                                                                                                                                                                                           |   |
|---------------------------------------------------------------------------------------------------------------------------------------------------------------------------------------------------------------------------|---|
| Fig. SI 1. Infrared spectra of compound 3 in KBr pellet.....                                                                                                                                                              | 2 |
| Fig. SI 2. ToF-HRMS spectra of compound 3 (ES <sup>+</sup> ) .....                                                                                                                                                        | 2 |
| Fig. SI 3. Infrared spectra of compound 1 in KBr pellet.....                                                                                                                                                              | 3 |
| Fig. SI 4. <sup>1</sup> H-NMR spectra of compound 1 (500 MHz, CDCl <sub>3</sub> ) .....                                                                                                                                   | 3 |
| Fig. SI 5. <sup>13</sup> C-NMR spectra of compound 1 (125 MHz, CDCl <sub>3</sub> ) .....                                                                                                                                  | 4 |
| Fig. SI 6. ToF-HRMS spectra of compound 1 (ES <sup>+</sup> ) .....                                                                                                                                                        | 4 |
| Fig. SI 7. UV/Vis spectra of compound 1 (L) at various aprotic solvents (c <sub>tot</sub> 5 × 10 <sup>-5</sup> mol dm <sup>-3</sup> ) .....                                                                               | 5 |
| Fig SI 8. Fluorescence changes of compounds 1 (C1) induced by various metal ions in DMSO under UV light 365 nm. (1:1, molar ratio, c <sub>total</sub> 10 <sup>-5</sup> mol dm <sup>-3</sup> ) .....                       | 5 |
| Fig SI 9. Emission spectra of compound 1 (C1) with the addition of Al <sup>3+</sup> in DMSO, DMF, and dioxane (1:1, molar ratio, c <sub>total</sub> 10 <sup>-5</sup> mol dm <sup>-3</sup> , λ <sub>ex</sub> 360 nm) ..... | 5 |
| Fig. SI 10. ToF-HRMS spectra of compound 1+Al <sup>3+</sup> (ES <sup>+</sup> ) .....                                                                                                                                      | 6 |
| Table SI 1. Calculated imaginary frequency values of vibrated atoms of compound 1                                                                                                                                         | 6 |

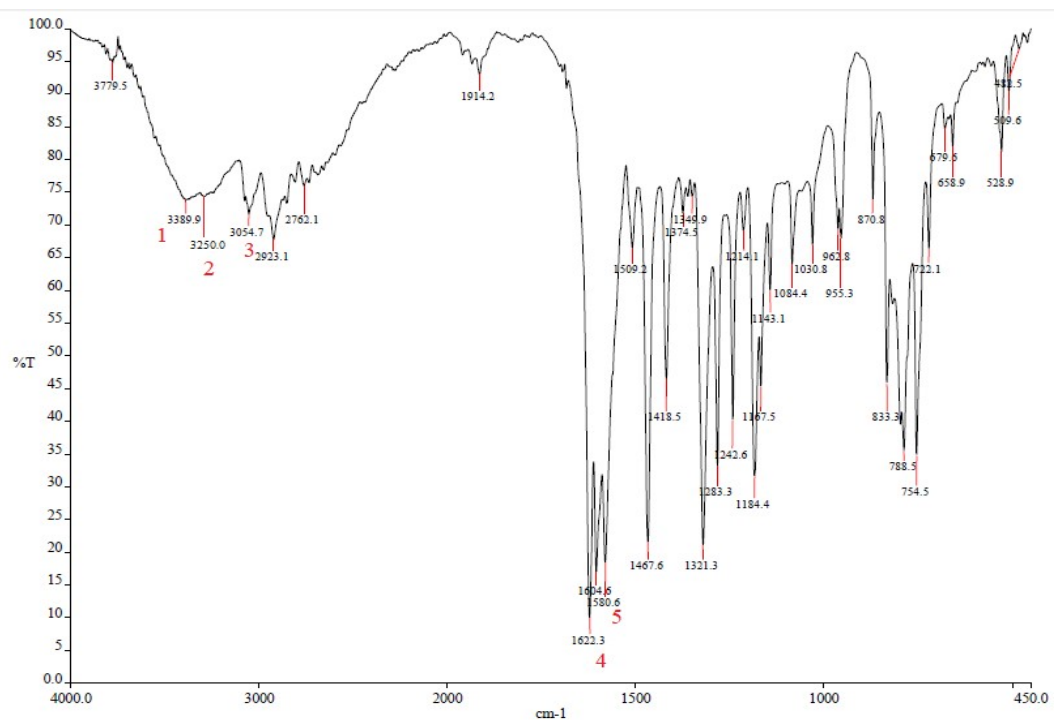

Fig. SI 1. Infrared spectra of compound **3** in KBr pellet

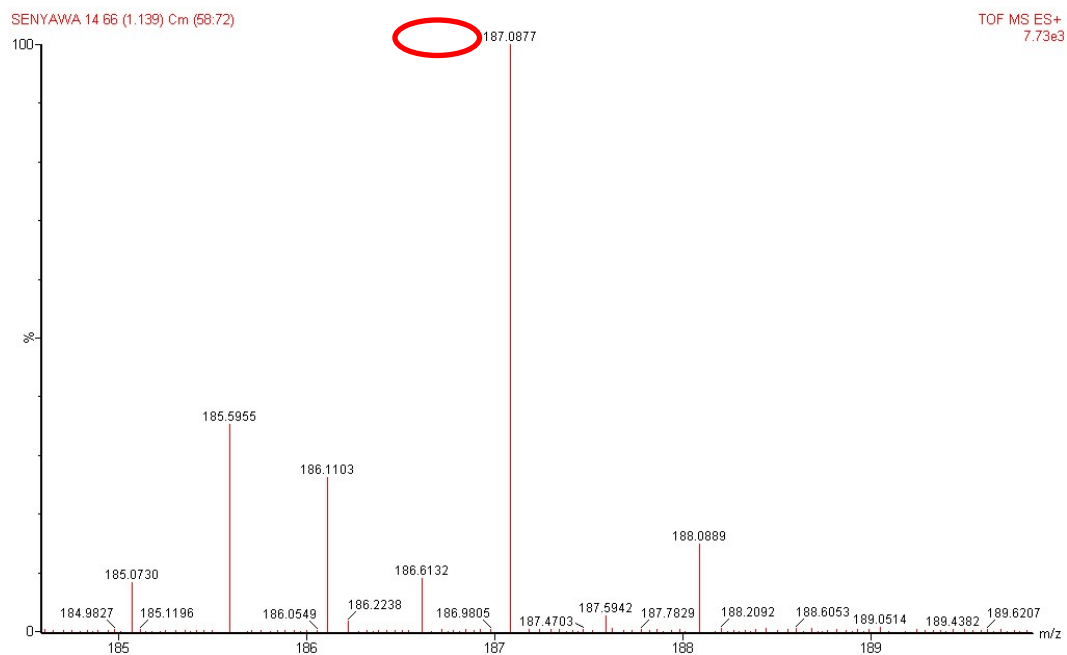

Fig. SI 2. ToF-HRMS spectra of compound **3** (ES<sup>+</sup>)

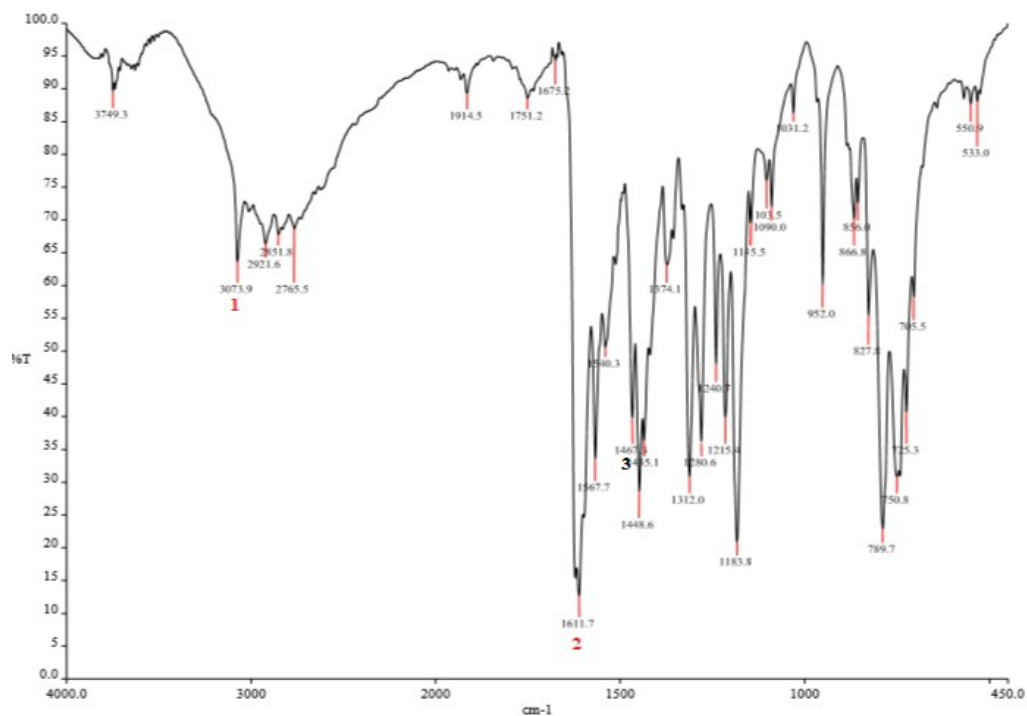

Fig. SI 3. Infrared spectra of compound **1** in KBr pellet

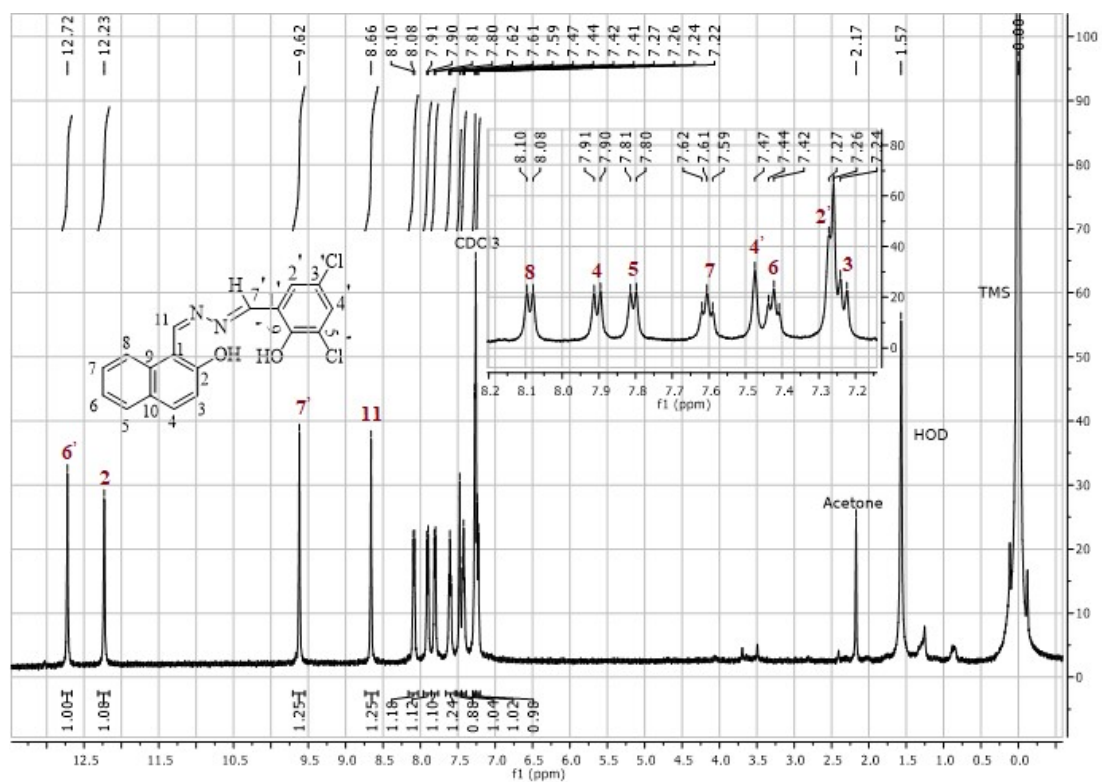

Fig. SI 4.  $^1\text{H-NMR}$  spectra of compound **1** (500 MHz,  $\text{CDCl}_3$ )

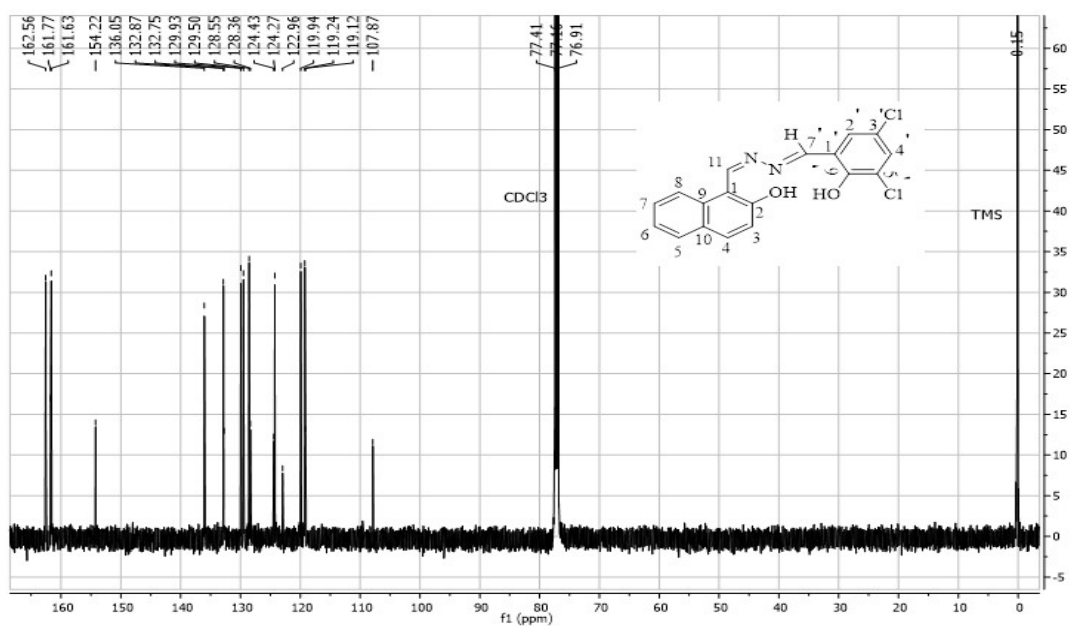

Fig. SI 5.  $^{13}\text{C}$ -NMR spectra of compound 1 (125 MHz,  $\text{CDCl}_3$ )

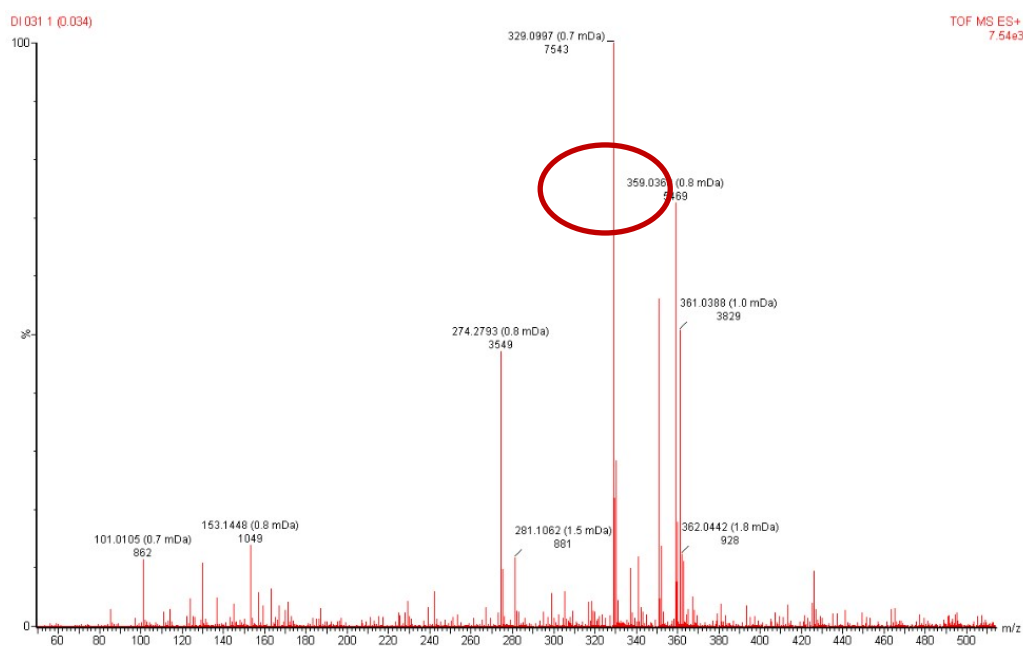

Fig. SI 6. ToF-HRMS spectra of compound 1 ( $\text{ES}^+$ )

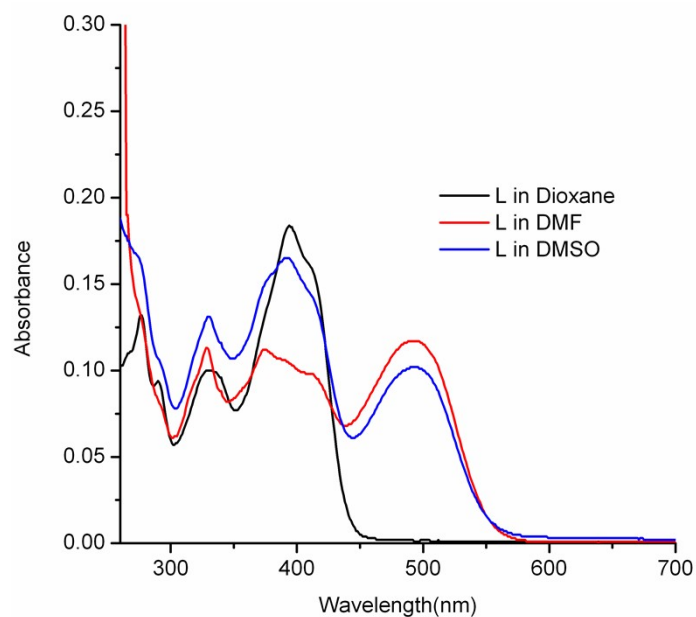

Fig. SI 7. UV/Vis spectra of compound **1 (L)** at various aprotic solvents ( $c_{tot} 5 \times 10^{-5}$  mole  $dm^{-3}$ )

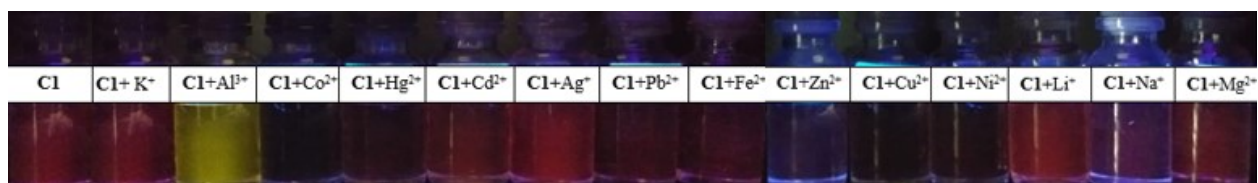

Fig SI 8. Fluorescence changes of compounds **1 (C1)** induced by various metal ions in DMSO under UV light 365 nm. (1:1, mole ratio,  $c_{total} 10^{-5}$  mole  $dm^{-3}$ )

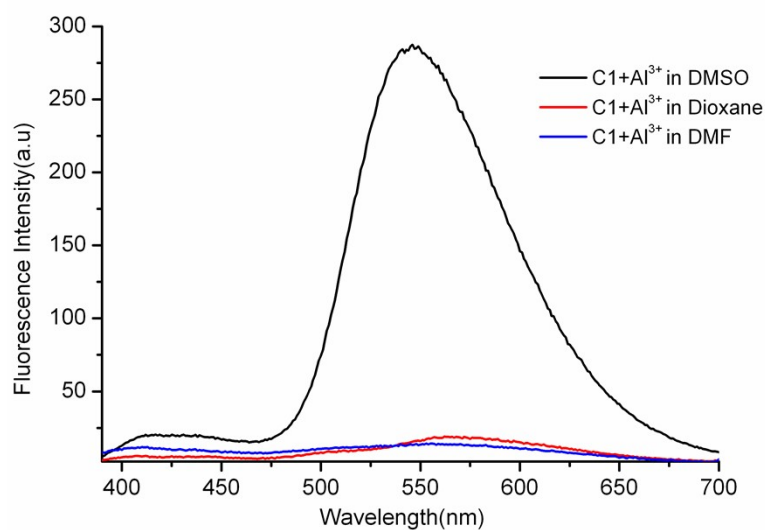

Fig SI 9. Emission spectra of compound **1 (C1)** with the addition of  $Al^{3+}$  in DMSO, DMF, and dioxane (1:1, mole ratio,  $c_{total} 10^{-5}$  mol  $dm^{-3}$ ,  $\lambda_{ex} 360$  nm)

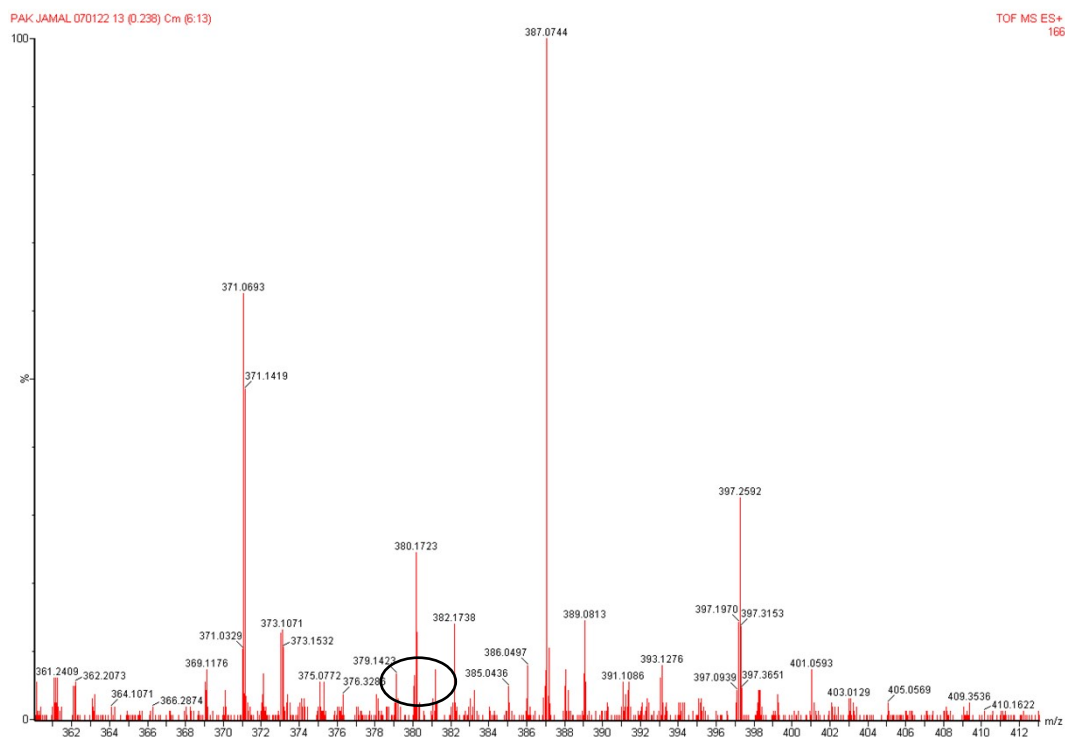

Fig. SI 10. ToF-HRMS spectra of compound **1**+Al<sup>3+</sup> (ES<sup>+</sup>)

Table SI 1. Calculated imaginary frequency values of vibrated atoms of compound **1**

| Mode | Frequency/cm <sup>-1</sup> | IR Intensity/km mol <sup>-1</sup> |
|------|----------------------------|-----------------------------------|
| 1    | 17.68                      | 0.5215                            |
| 2    | 27.92                      | 0.1514                            |
| 3    | 61.16                      | 0.4514                            |
| 4    | 69.08                      | 2.8846                            |
| 5    | 112.06                     | 3.8562                            |
| 6    | 117.44                     | 1.0852                            |
| 7    | 131.91                     | 0.2649                            |
| 8    | 159.71                     | 2.6537                            |
| 9    | 175.11                     | 1.7022                            |
| 10   | 185.97                     | 1.4276                            |
| 11   | 190.67                     | 22.5292                           |
| 12   | 207.62                     | 42.5277                           |
| 13   | 216.14                     | 16.5373                           |
| 14   | 272.22                     | 3.5125                            |
| 15   | 284.81                     | 18.1407                           |
| 16   | 311.89                     | 2.4789                            |
| 17   | 324.8                      | 8.3081                            |
| 18   | 368                        | 65.9319                           |
| 19   | 370                        | 6.6616                            |
| 20   | 375.71                     | 0.2988                            |
